# Supplementary material
Source: publisher figshare collection journal article supplement (https://tandf.figshare.com/ndownloader/files/18654380)
Supplement: Supplementary file 1 [file 18654380]

Supplementary Figures- 3D pictures of docked files


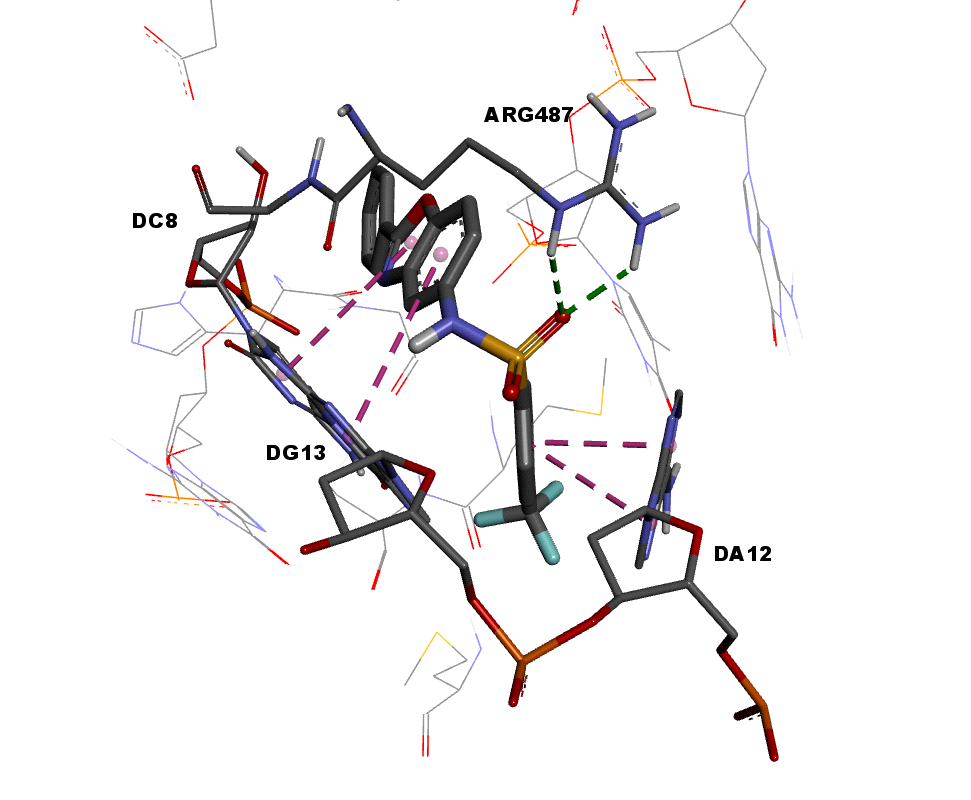


**Figure 1** Docked position of PTPS: compound revealed H-bond with Arg487; pi-pi stacking with deoxycytidine DC8, deoxyadenosine DA12 and deoxyguanosin DG13.


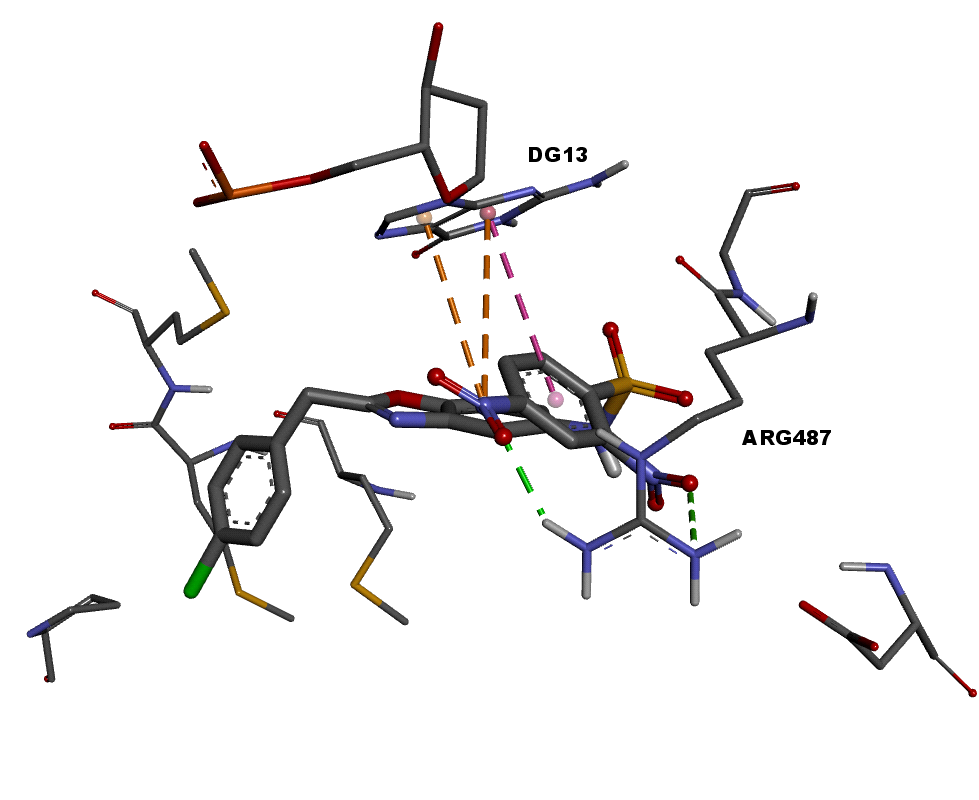


**Figure 2**  Docked position of CNSB: compound revealed H-bond and salt bridge with Arg487; pi-pi stacking and pi-cation interactions with deoxyguanosin DG13.


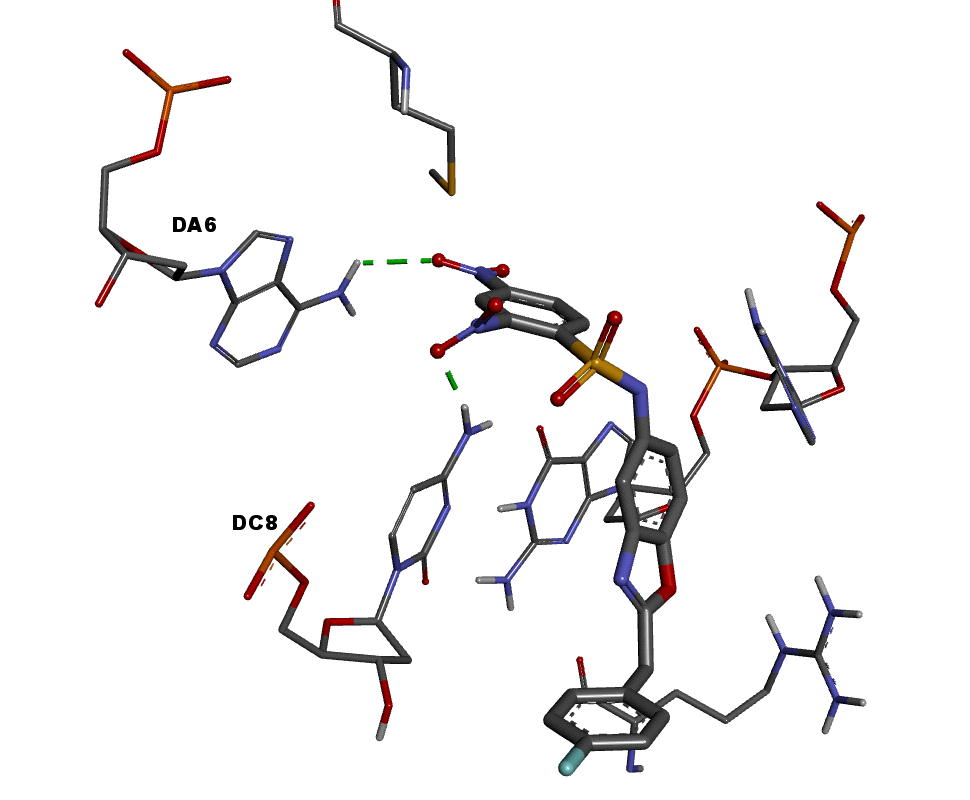


**Figure 3 a)** Docked position of FBPS: compound revealed H-bonds with deoxyadenosine DA6 and deoxycytidine DC8.
